# Supplementary material for: Synthesis of N-cyano-substituted sulfilimine and sulfoximine derivatives of S0859 and their biological evaluation as sodium bicarbonate co-transport inhibitors
Source: Royal Society of Chemistry journal article supplement (doi:10.1039/c5md00367a), 2015-01-01

## Supporting Information for

### **Synthesis of *N*-cyano-substituted sulfilimine and sulfoximine derivatives of S0859 and their biological evaluation as sodium bicarbonate co-transport inhibitors**

Anne-Dorothee Steinkamp,<sup>[a]</sup> Nico Seling,<sup>[a]</sup> Soojung Lee,<sup>[b]</sup> Ebbe Boedtkjer<sup>[b]</sup>  
and Carsten Bolm\*<sup>[a]</sup>

<sup>[a]</sup> Institute of Organic Chemistry, RWTH Aachen University, Landoltweg 1, D-52074 Aachen, Germany. E-mail: carsten.bolm@oc.rwth-aachen.de

<sup>[b]</sup> Department of Biomedicine, Aarhus University, Ole Worms Allé 3, Building 1170, DK-8000 Aarhus C (Denmark). E-mail: eb@biomed.au.dk

#### **Table of Contents**

- Results from the NCI-60 DTP Human Tumor Cell Line Screen performed within the Developmental Therapeutics Program of the Division of Cancer Treatment and Diagnosis [US National Cancer Institute (NCI)/National Institutes of Health (NIH); <http://dtp.cancer.gov>]
  - a) Compound **2** S2
  - b) Compound **3** S3
- Copies of NMR spectra S4
- Copies of mass spectra S10

# Developmental Therapeutics Program

NSC: D-781554 / 1

Conc: 1.00E-5 Molar

Test Date: Aug 04, 2014

## One Dose Mean Graph

S2

Experiment ID: 1408OS30

Report Date: Aug 20, 2014

### Panel/Cell Line

### Growth Percent

### Mean Growth Percent - Growth Percent

|                            |        |  |
|----------------------------|--------|--|
| Leukemia                   |        |  |
| CCRF-CEM                   | 94.86  |  |
| HL-60(TB)                  | 90.26  |  |
| K-562                      | 66.31  |  |
| MOLT-4                     | 66.18  |  |
| RPMI-8226                  | 75.60  |  |
| SR                         | 65.38  |  |
| Non-Small Cell Lung Cancer |        |  |
| A549/ATCC                  | 75.31  |  |
| EKVX                       | 79.25  |  |
| HOP-62                     | 89.04  |  |
| HOP-92                     | 60.73  |  |
| NCI-H226                   | 82.40  |  |
| NCI-H23                    | 75.03  |  |
| NCI-H322M                  | 84.67  |  |
| NCI-H460                   | 87.84  |  |
| Colon Cancer               |        |  |
| COLO 205                   | 75.79  |  |
| HCC-2998                   | 108.20 |  |
| HCT-116                    | 72.97  |  |
| HCT-15                     | 79.01  |  |
| KM12                       | 82.33  |  |
| SW-620                     | 90.48  |  |
| CNS Cancer                 |        |  |
| SF-268                     | 86.26  |  |
| SF-295                     | 72.36  |  |
| SF-539                     | 88.62  |  |
| SNB-19                     | 98.52  |  |
| SNB-75                     | 78.81  |  |
| U251                       | 88.48  |  |
| Melanoma                   |        |  |
| LOX IMVI                   | 79.99  |  |
| MALME-3M                   | 83.27  |  |
| M14                        | 83.77  |  |
| MDA-MB-435                 | 86.49  |  |
| SK-MEL-28                  | 96.56  |  |
| UACC-257                   | 101.24 |  |
| UACC-62                    | 70.74  |  |
| Ovarian Cancer             |        |  |
| IGROV1                     | 68.60  |  |
| OVCAR-3                    | 90.50  |  |
| OVCAR-4                    | 74.80  |  |
| OVCAR-5                    | 105.21 |  |
| OVCAR-8                    | 92.22  |  |
| NCI/ADR-RES                | 84.09  |  |
| SK-OV-3                    | 84.04  |  |
| Renal Cancer               |        |  |
| 786-0                      | 89.71  |  |
| A498                       | 73.79  |  |
| ACHN                       | 79.44  |  |
| CAKI-1                     | 67.79  |  |
| RXF 393                    | 81.07  |  |
| SN12C                      | 82.78  |  |
| UO-31                      | 60.39  |  |
| Prostate Cancer            |        |  |
| PC-3                       | 59.63  |  |
| DU-145                     | 95.91  |  |
| Breast Cancer              |        |  |
| MCF7                       | 67.91  |  |
| MDA-MB-231/ATCC            | 74.33  |  |
| HS 578T                    | 87.31  |  |
| BT-549                     | 92.20  |  |
| T-47D                      | 58.35  |  |
| MDA-MB-468                 | 74.68  |  |
| Mean                       | 81.12  |  |
| Delta                      | 22.77  |  |
| Range                      | 49.85  |  |

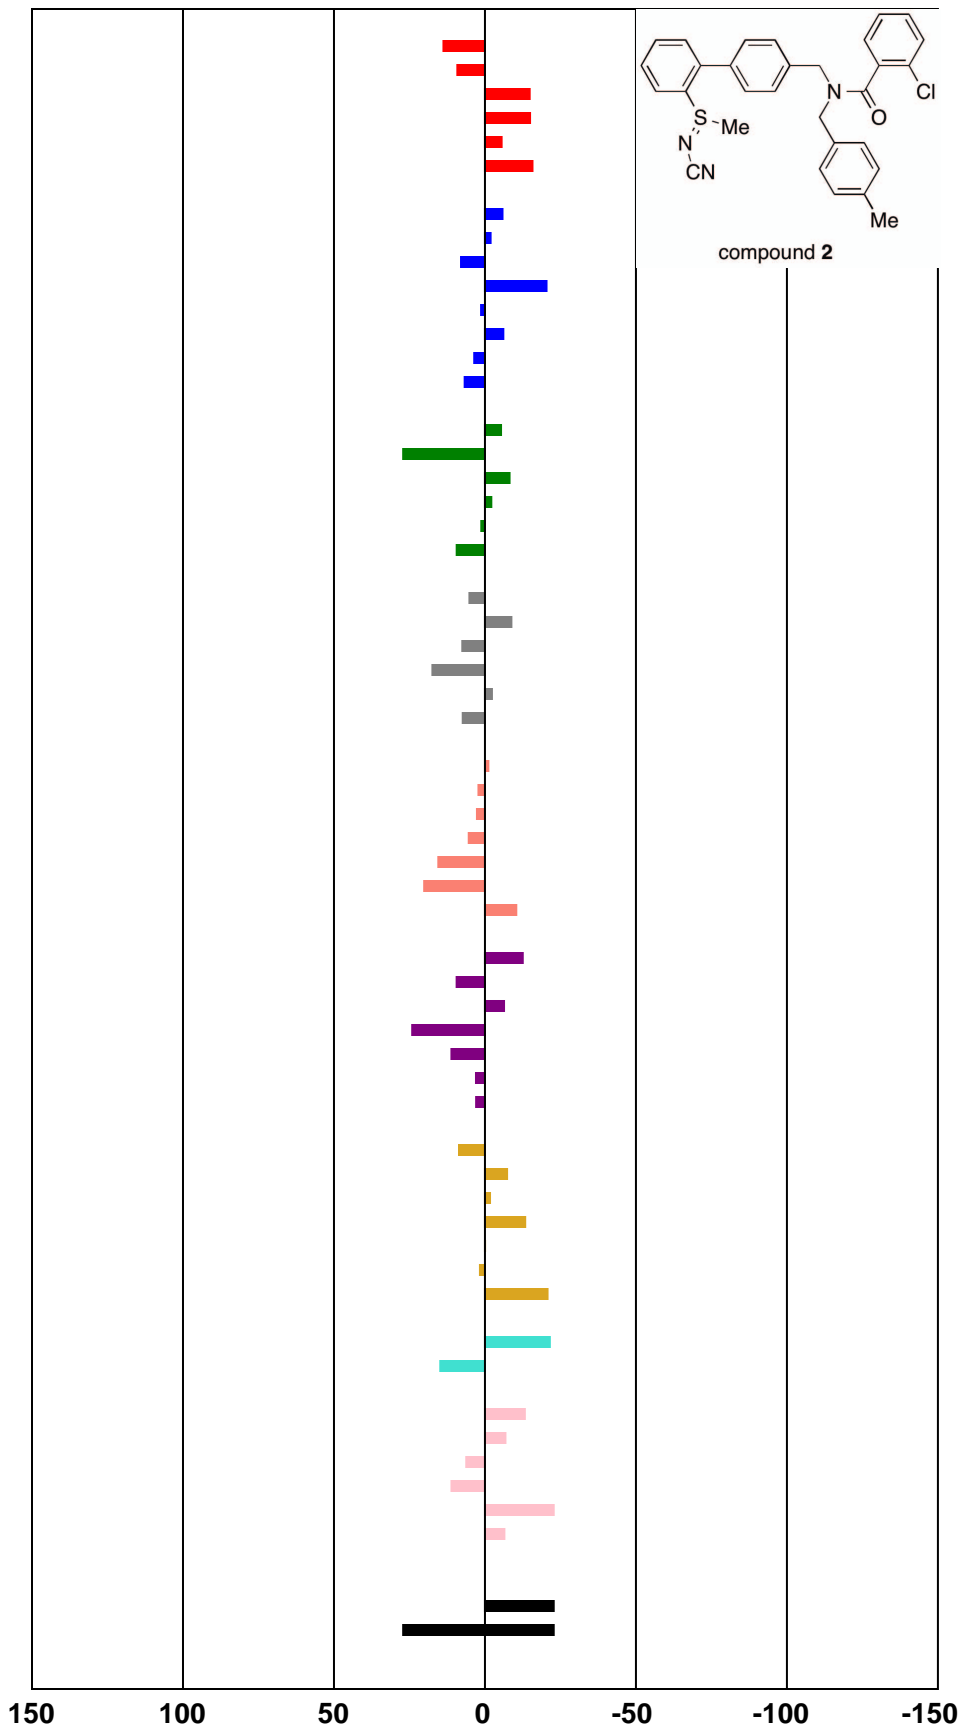

# Developmental Therapeutics Program

NSC: D-781555 / 2

Conc: 1.00E-5 Molar

Test Date: Aug 25, 2014

## One Dose Mean Graph

S3

Experiment ID: 1408OS42

Report Date: Sep 11, 2014

### Panel/Cell Line

### Growth Percent

### Mean Growth Percent - Growth Percent

|                            |        |
|----------------------------|--------|
| Leukemia                   |        |
| CCRF-CEM                   | 65.46  |
| HL-60(TB)                  | 81.58  |
| K-562                      | 51.95  |
| MOLT-4                     | 58.01  |
| RPMI-8226                  | 46.77  |
| SR                         | 47.53  |
| Non-Small Cell Lung Cancer |        |
| A549/ATCC                  | 64.39  |
| EKVX                       | 54.52  |
| HOP-92                     | 46.21  |
| NCI-H226                   | 72.87  |
| NCI-H23                    | 80.51  |
| NCI-H322M                  | 101.57 |
| NCI-H460                   | 67.16  |
| NCI-H522                   | 74.52  |
| Colon Cancer               |        |
| HCC-2998                   | 96.40  |
| HCT-116                    | 67.07  |
| HCT-15                     | 75.62  |
| HT29                       | 70.65  |
| KM12                       | 82.25  |
| SW-620                     | 87.31  |
| CNS Cancer                 |        |
| SF-268                     | 79.95  |
| SF-295                     | 69.87  |
| SF-539                     | 82.55  |
| SNB-19                     | 78.96  |
| SNB-75                     | 62.58  |
| Melanoma                   |        |
| LOX IMVI                   | 84.55  |
| MALME-3M                   | 96.67  |
| M14                        | 69.09  |
| MDA-MB-435                 | 88.26  |
| SK-MEL-2                   | 87.41  |
| SK-MEL-28                  | 96.94  |
| SK-MEL-5                   | 58.40  |
| UACC-257                   | 89.83  |
| UACC-62                    | 58.81  |
| Ovarian Cancer             |        |
| IGROV1                     | 81.18  |
| OVCAR-3                    | 82.05  |
| OVCAR-4                    | 64.11  |
| OVCAR-5                    | 115.28 |
| OVCAR-8                    | 76.68  |
| NCI/ADR-RES                | 64.87  |
| SK-OV-3                    | 85.26  |
| Renal Cancer               |        |
| 786-0                      | 77.60  |
| A498                       | 55.27  |
| ACHN                       | 76.19  |
| CAKI-1                     | 70.34  |
| RXF 393                    | 73.66  |
| SN12C                      | 78.86  |
| TK-10                      | 92.74  |
| UO-31                      | 46.83  |
| Prostate Cancer            |        |
| PC-3                       | 40.97  |
| DU-145                     | 90.42  |
| Breast Cancer              |        |
| MCF7                       | 52.84  |
| MDA-MB-231/ATCC            | 66.63  |
| HS 578T                    | 69.73  |
| BT-549                     | 76.57  |
| T-47D                      | 57.75  |
| MDA-MB-468                 | 61.02  |
| Mean                       | 72.86  |
| Delta                      | 31.89  |
| Range                      | 74.31  |

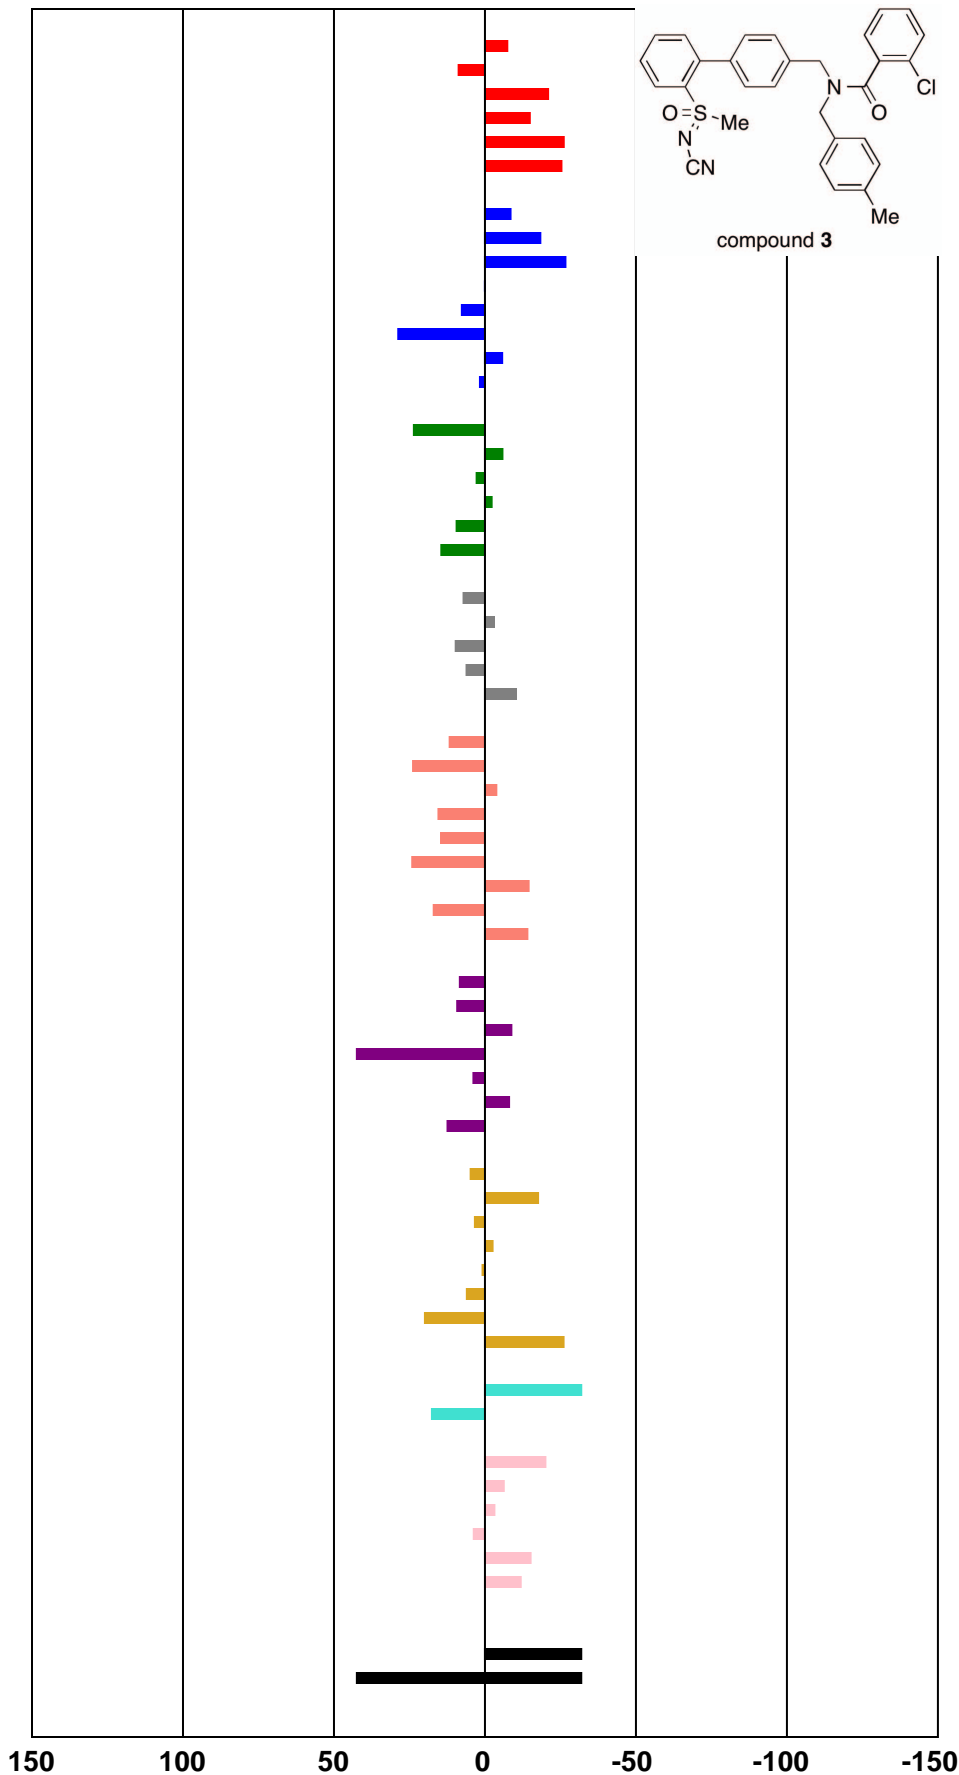

## Copies of NMR spectra

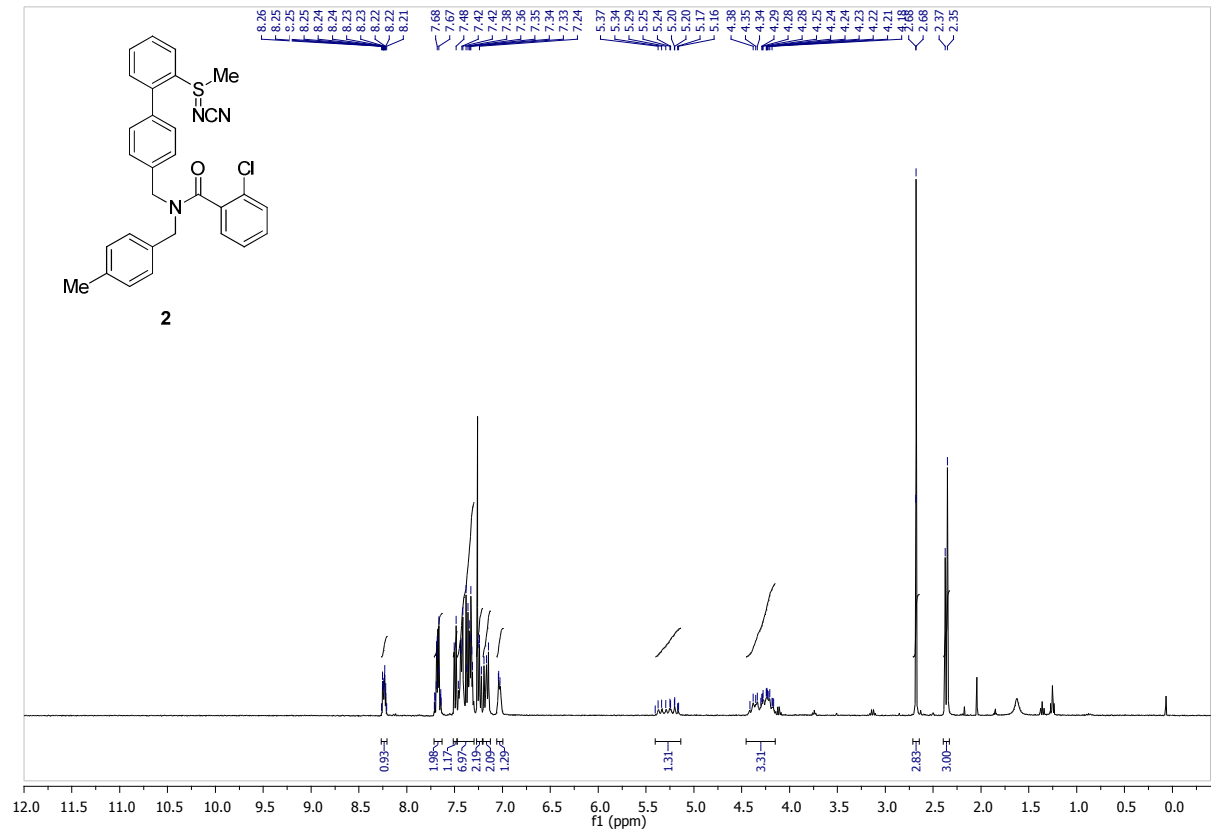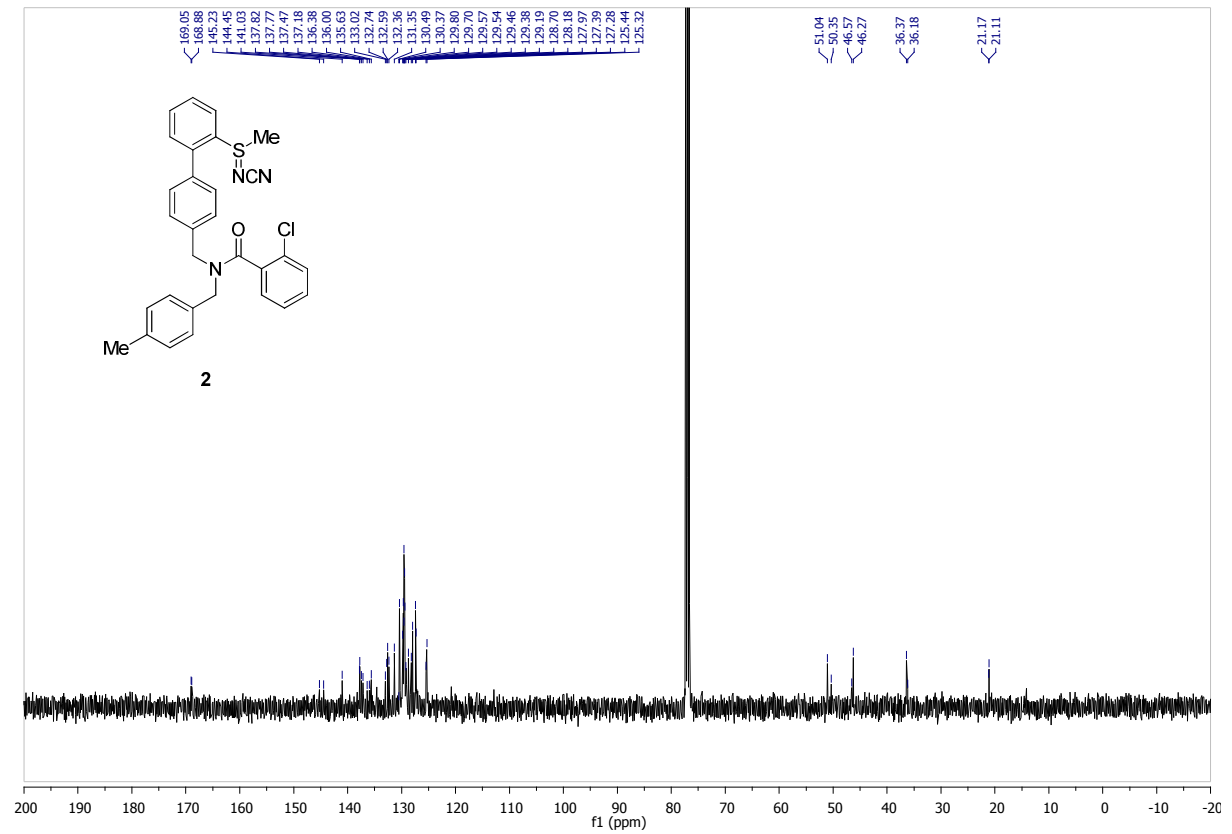

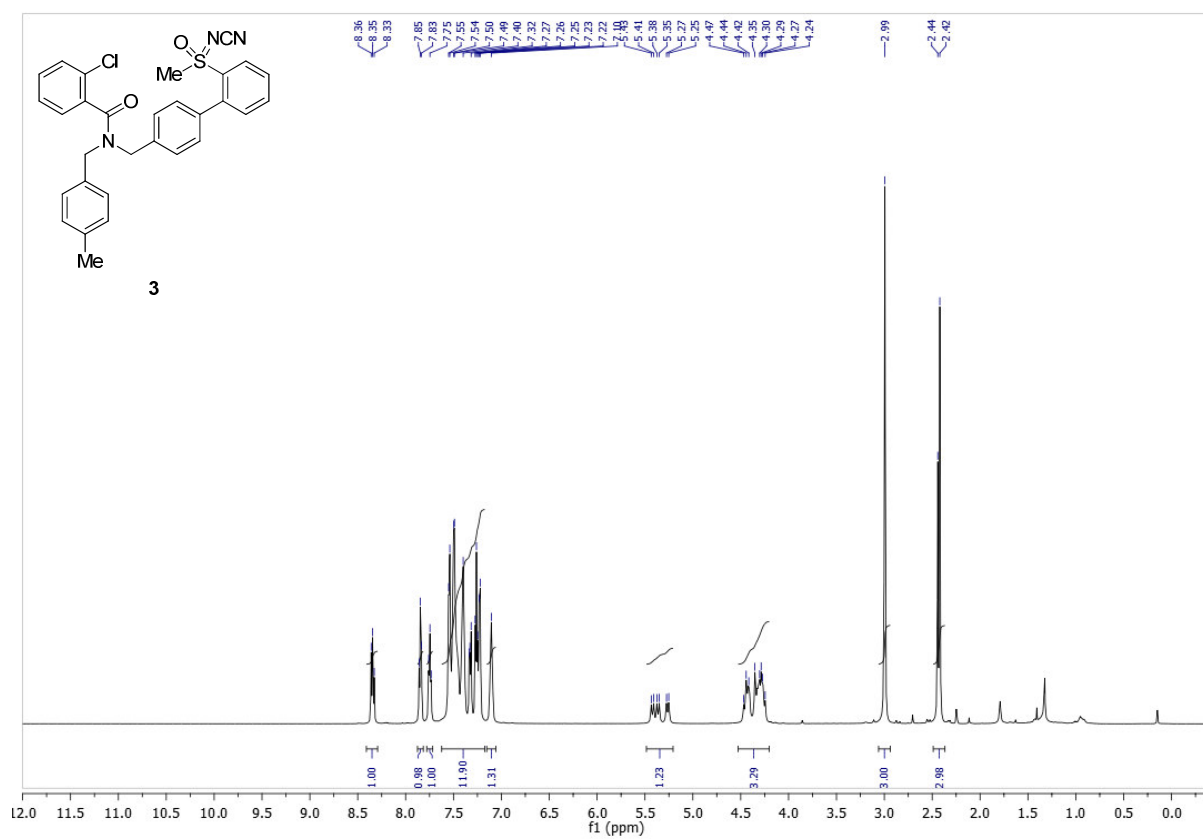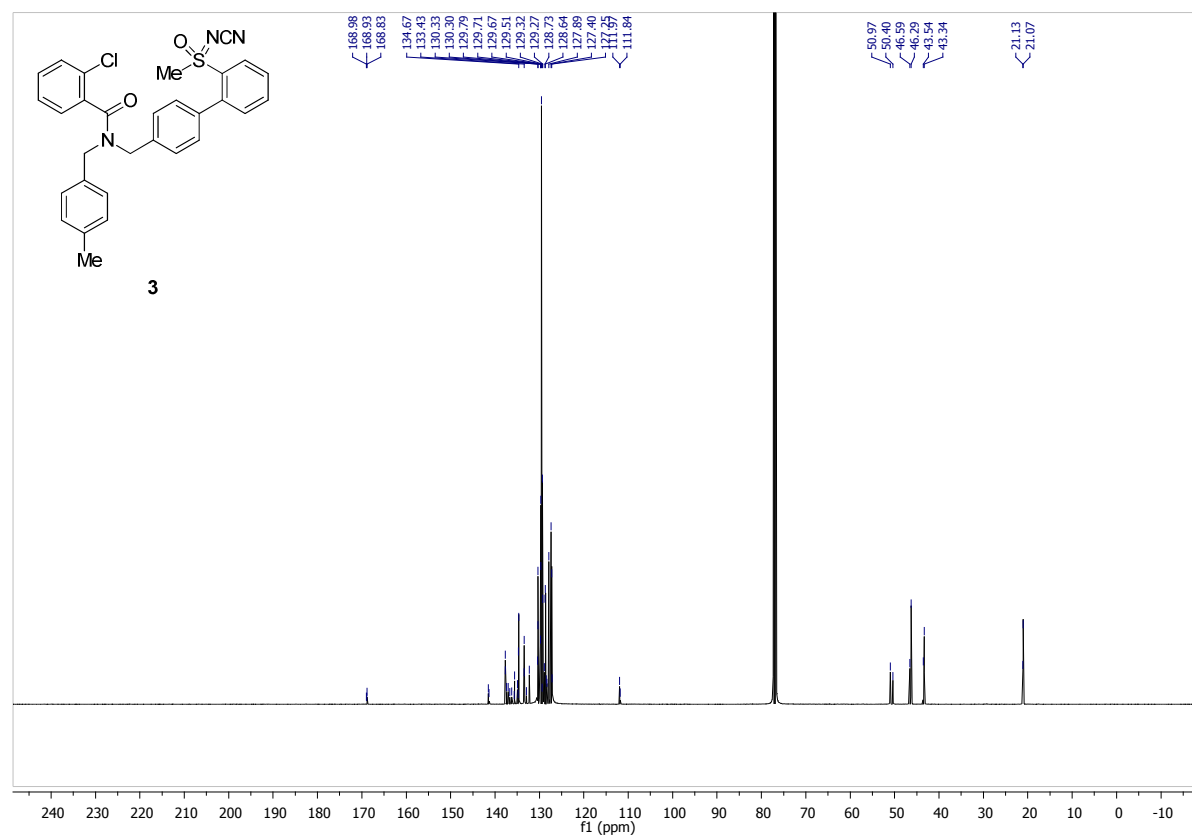

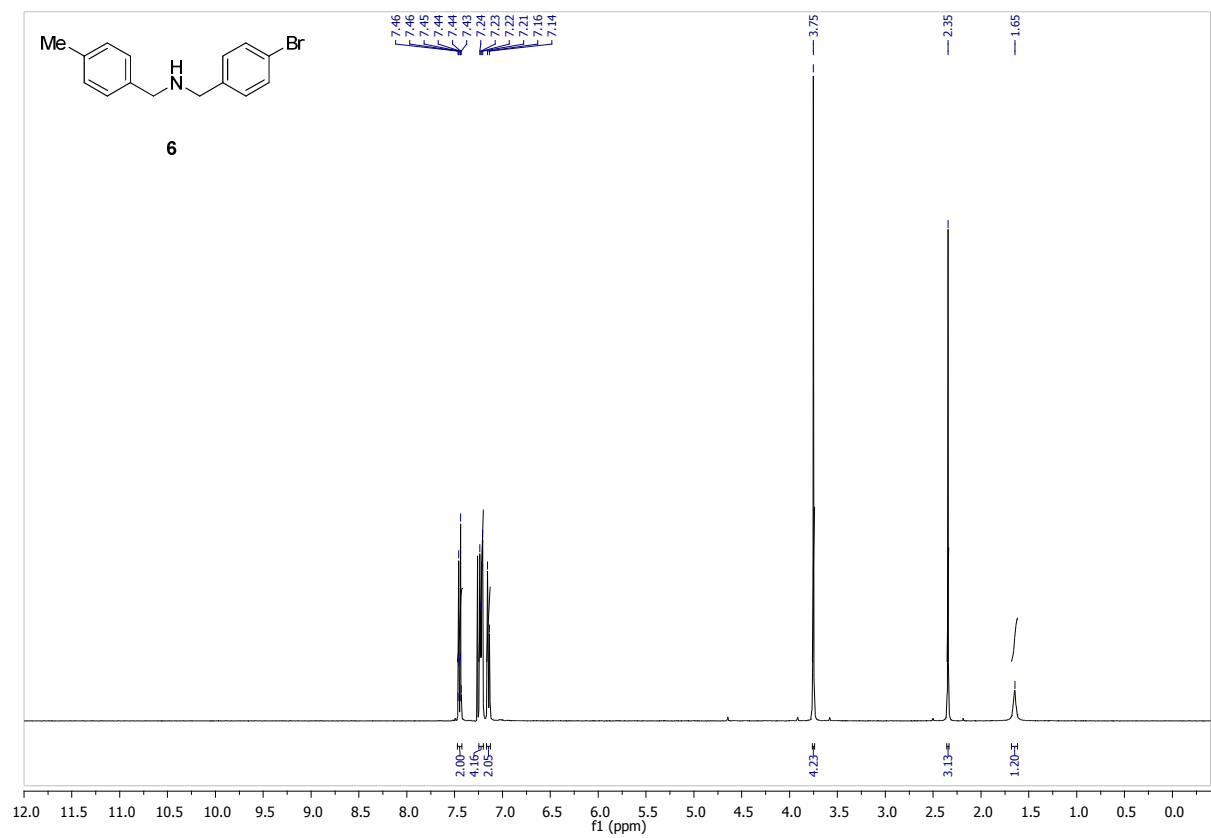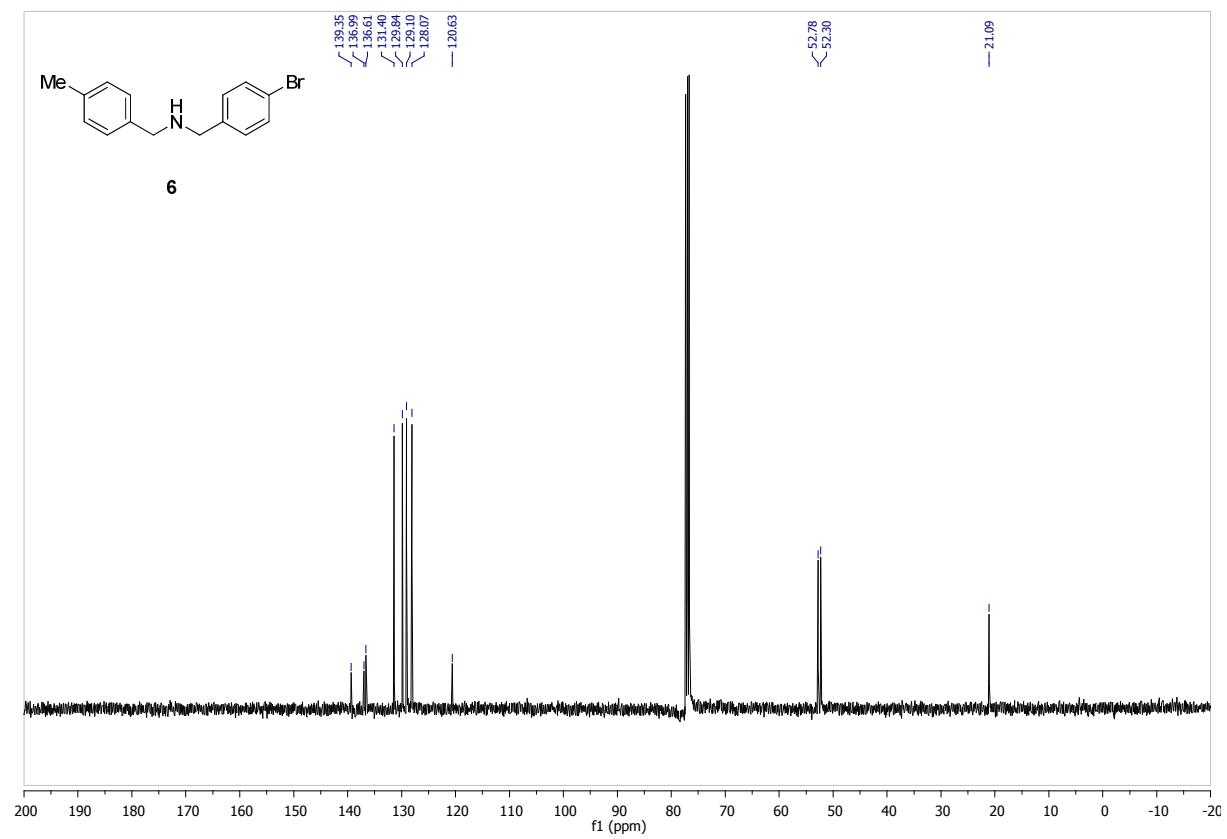

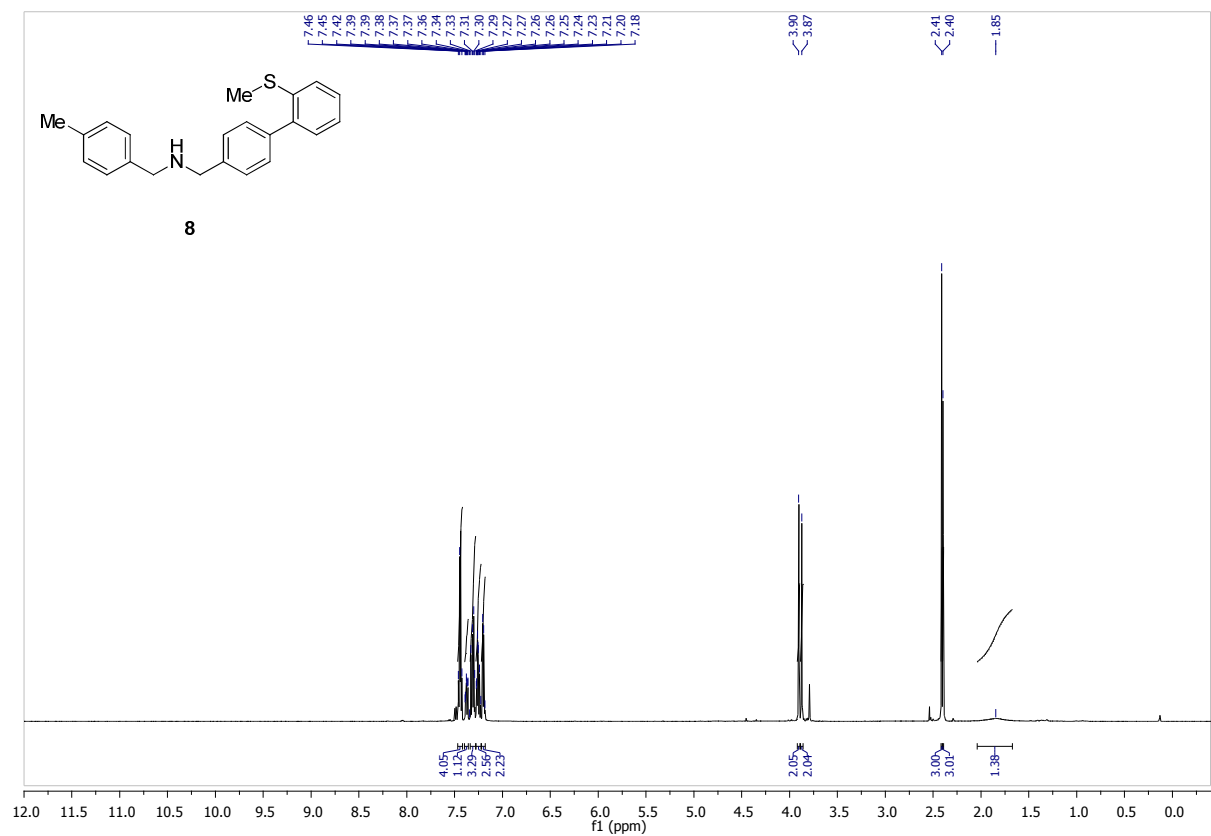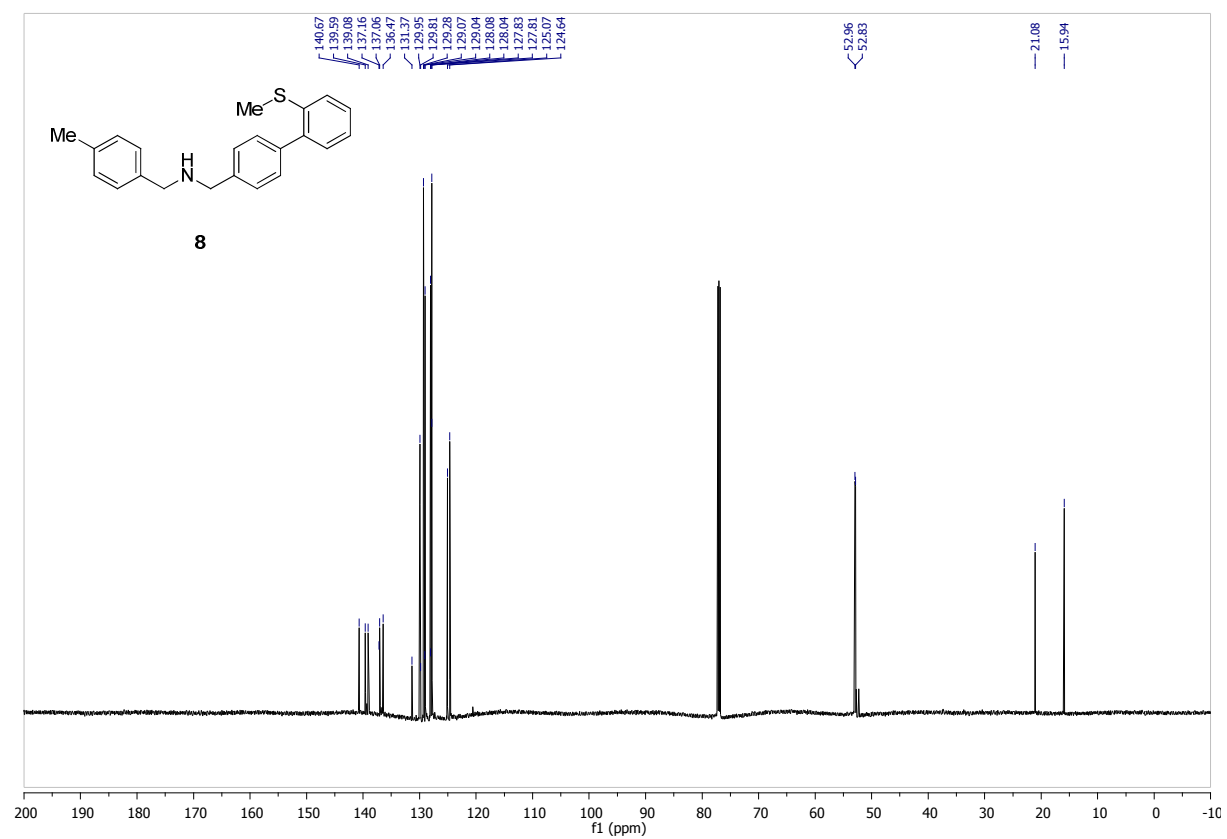

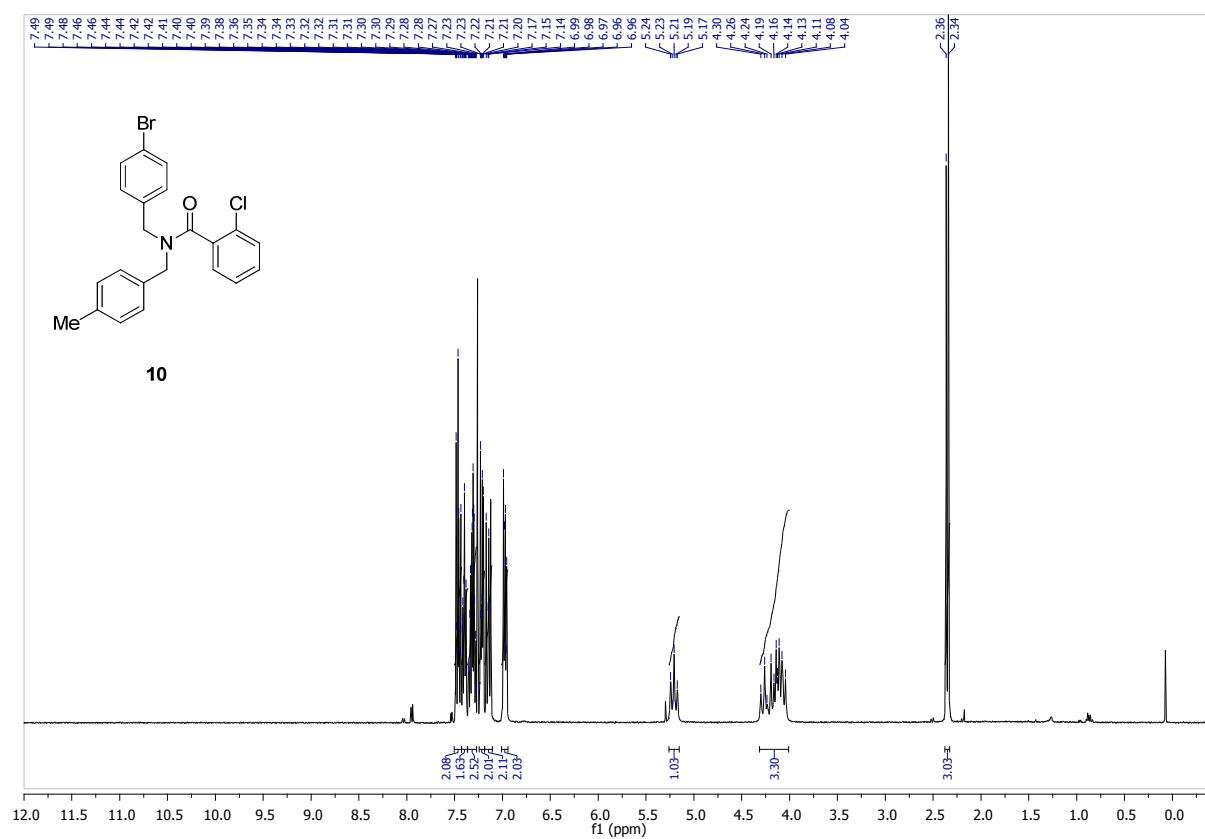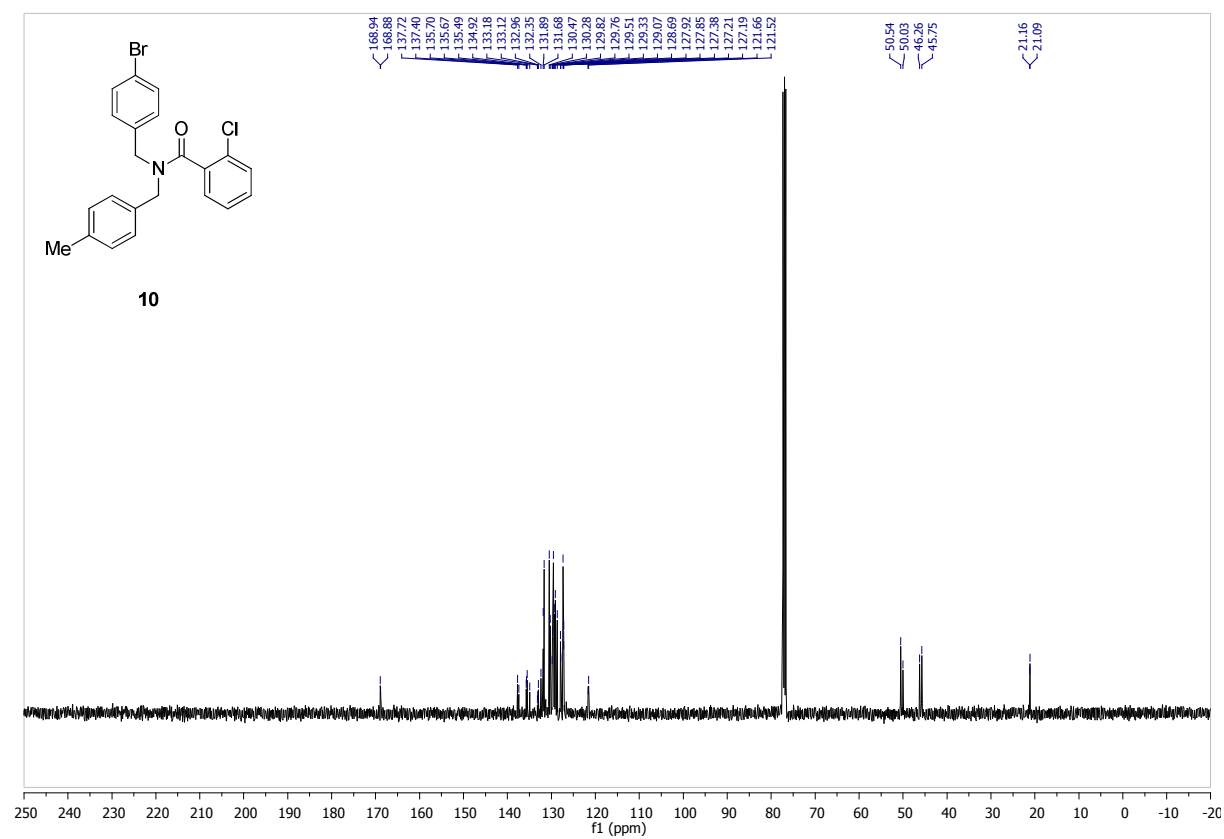



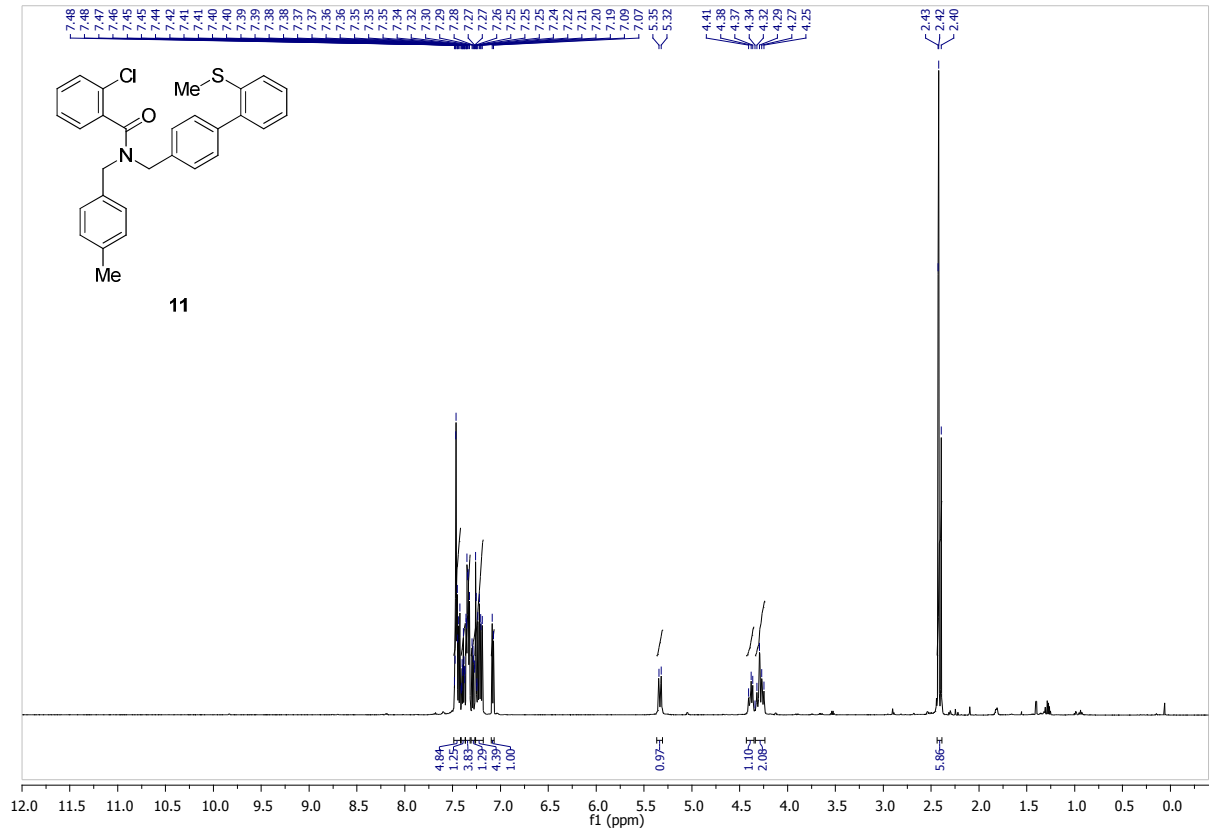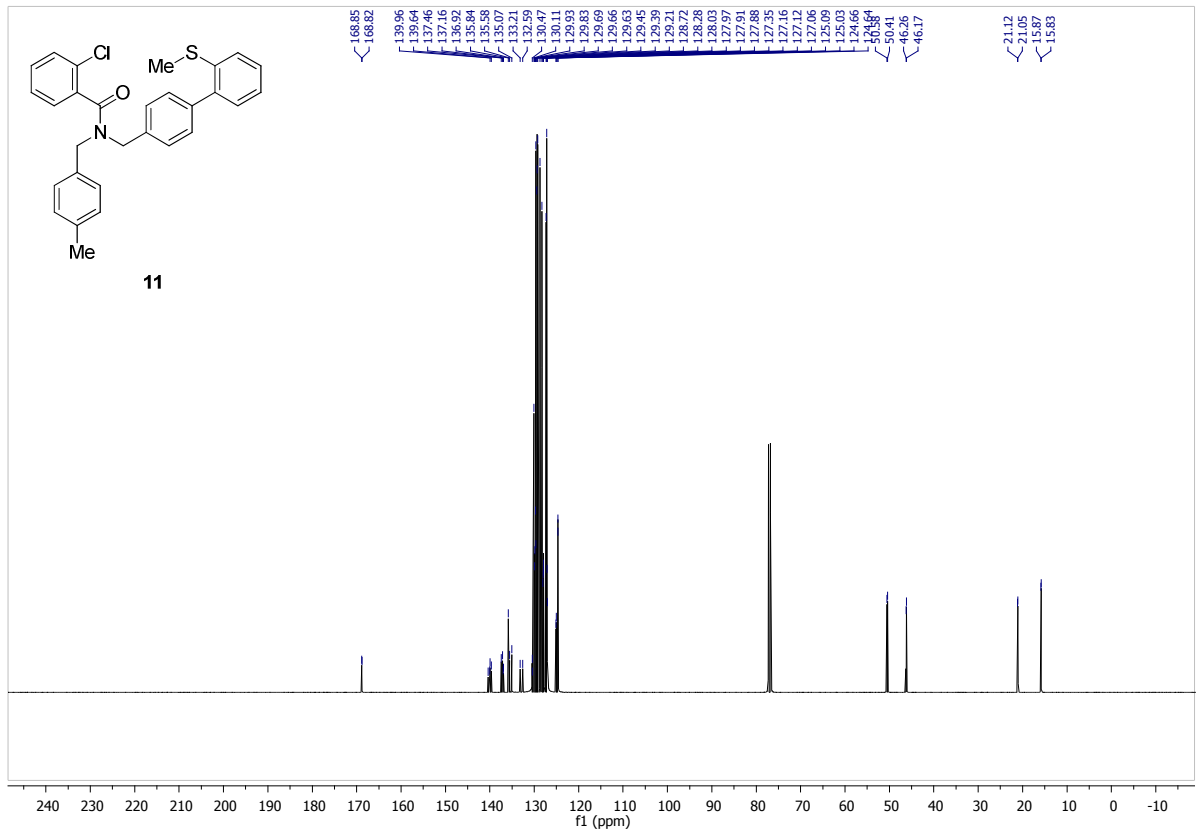

## Copies of MS spectra

## Compound 2

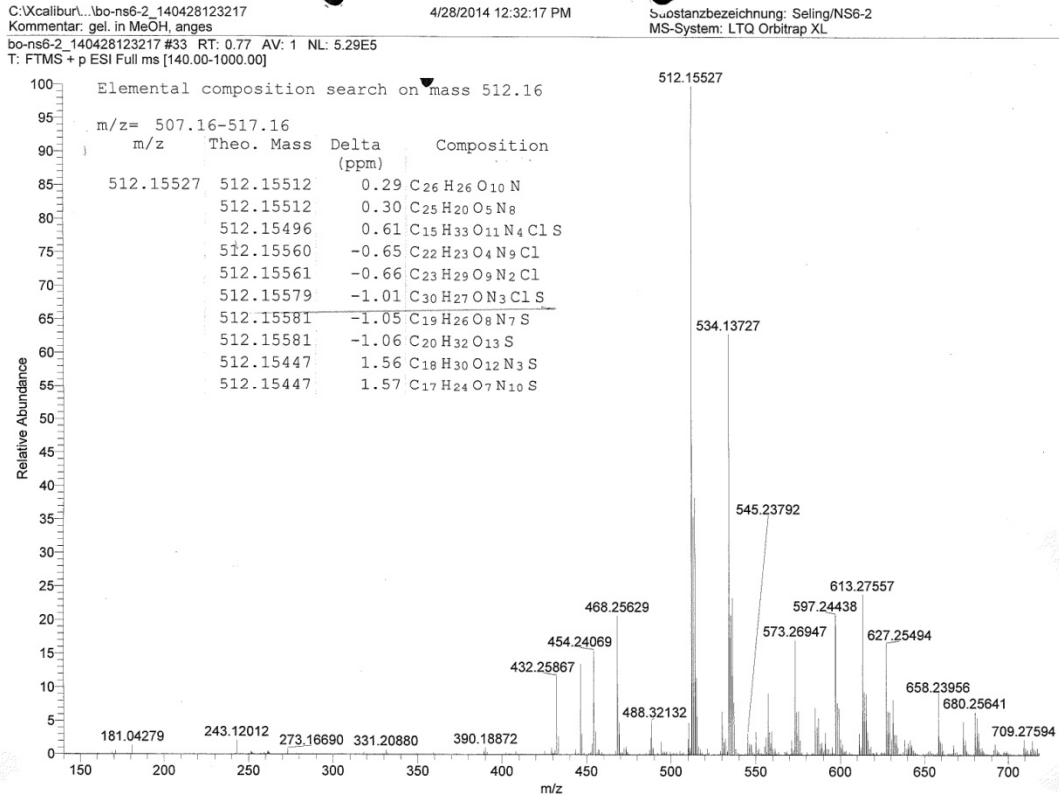

## Compound 3

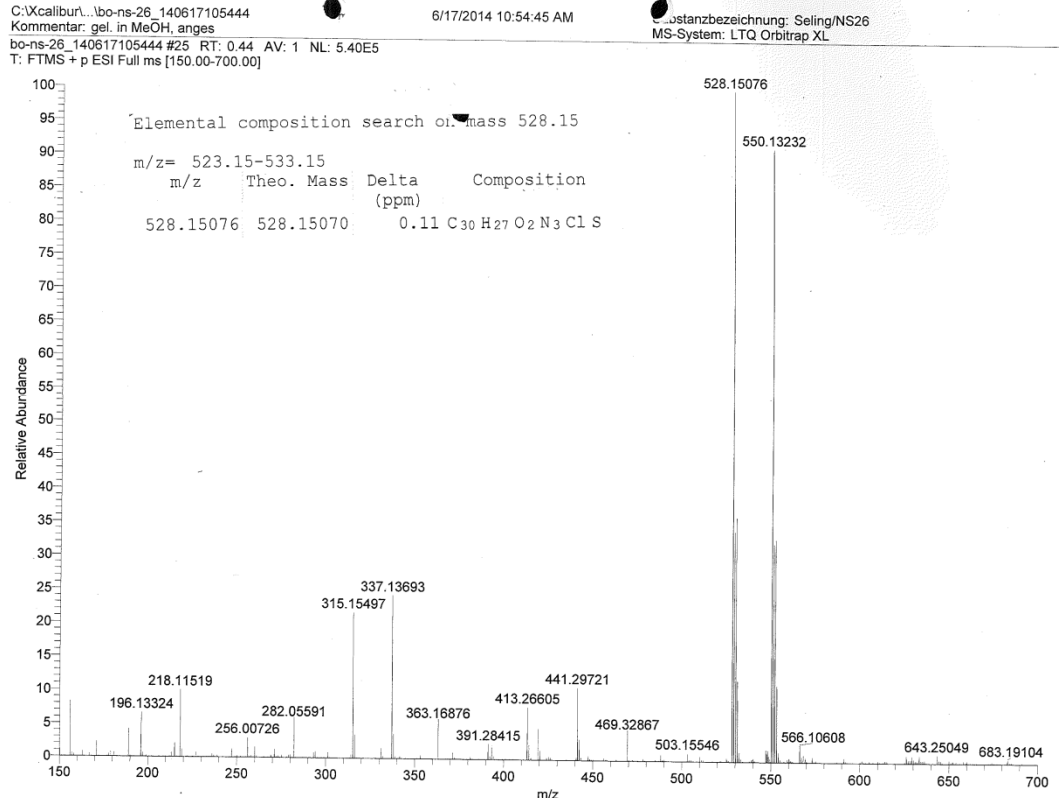

Compound 6

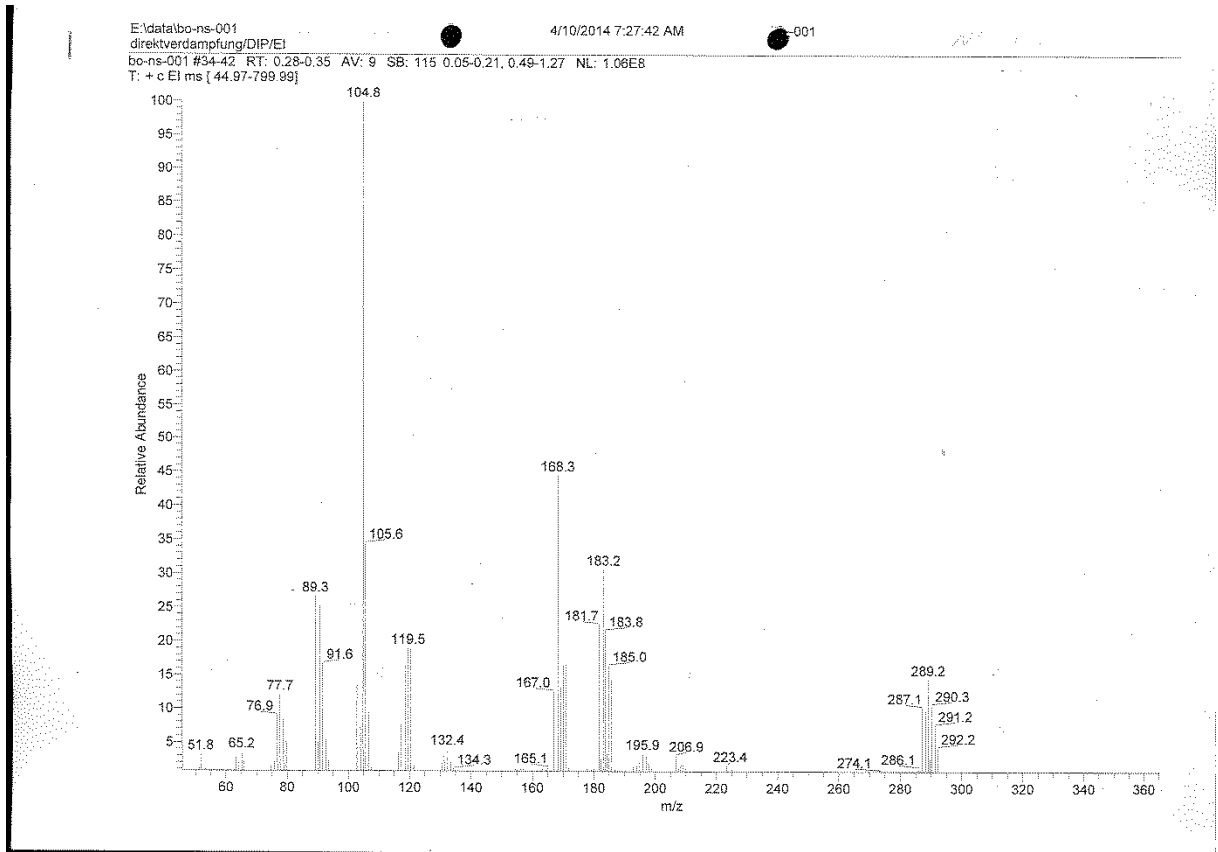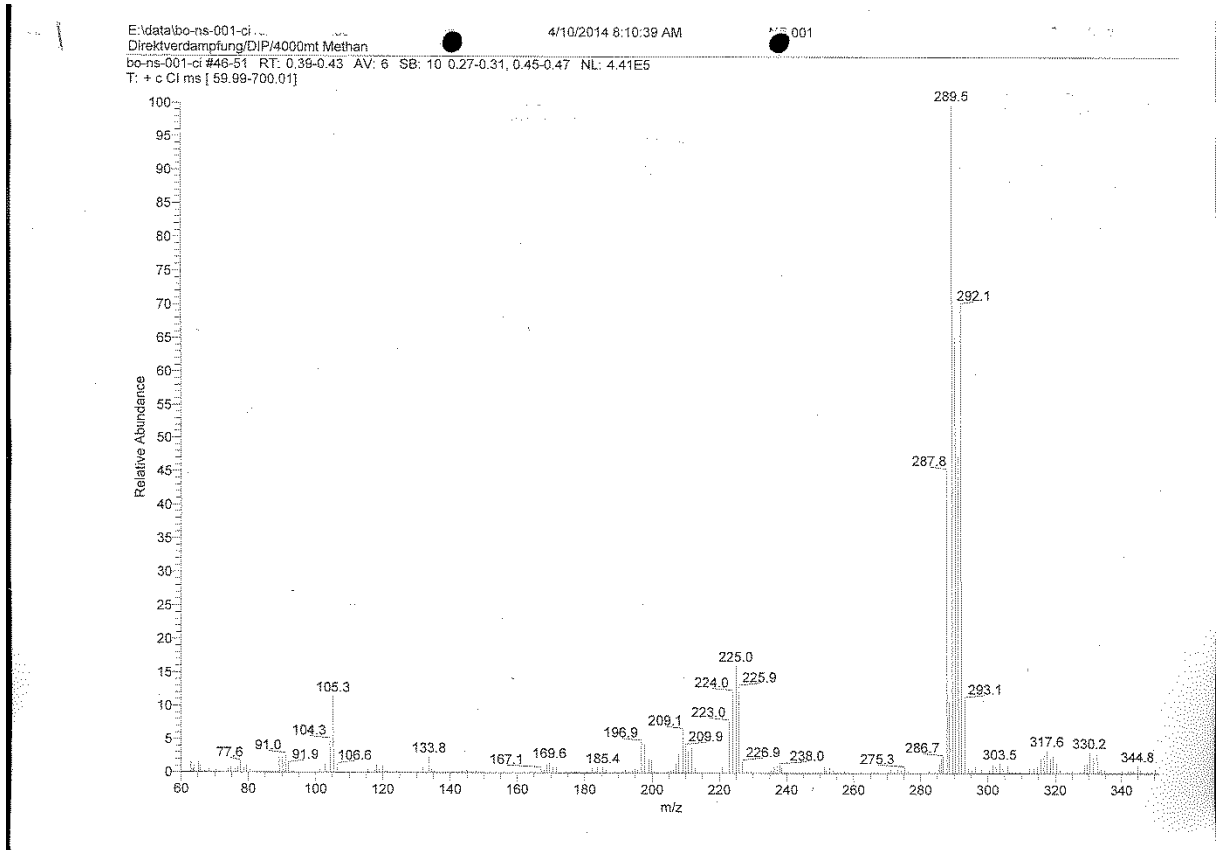

## Compound 8:

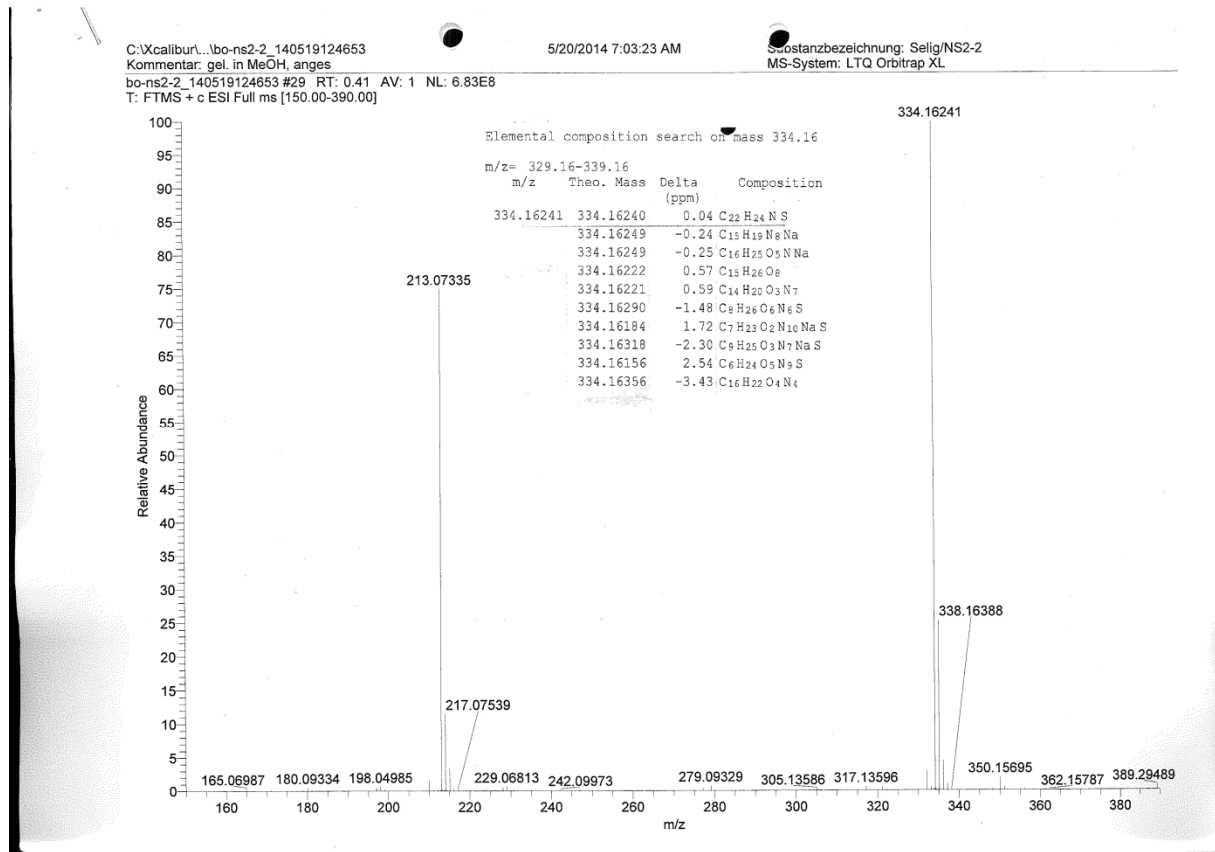

## Compound 10

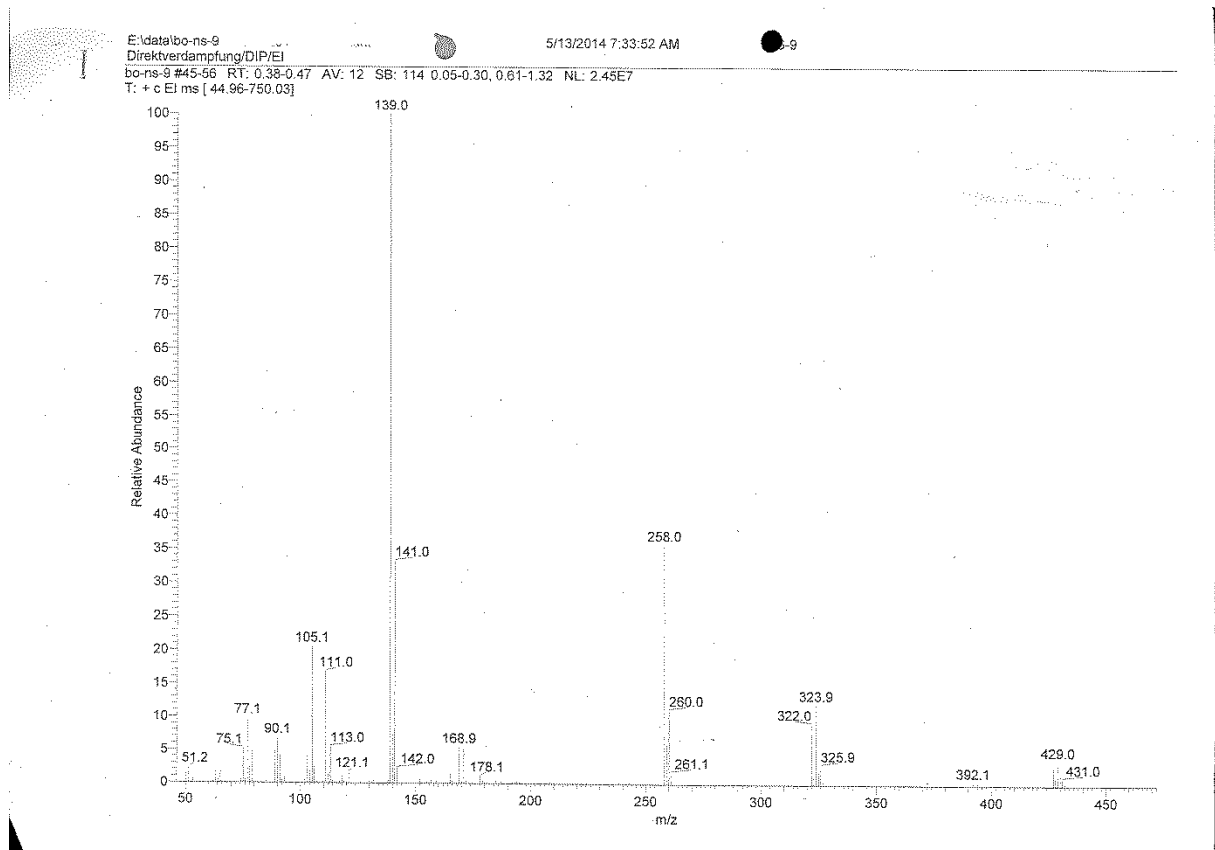

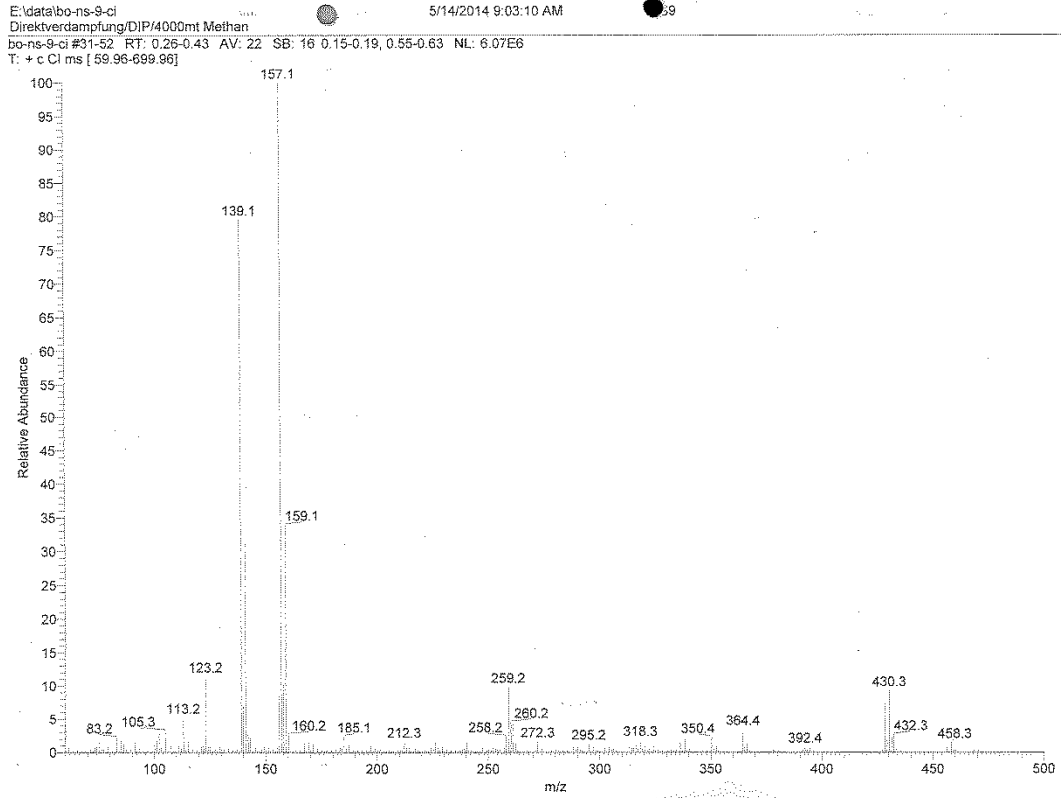

## Compound 11

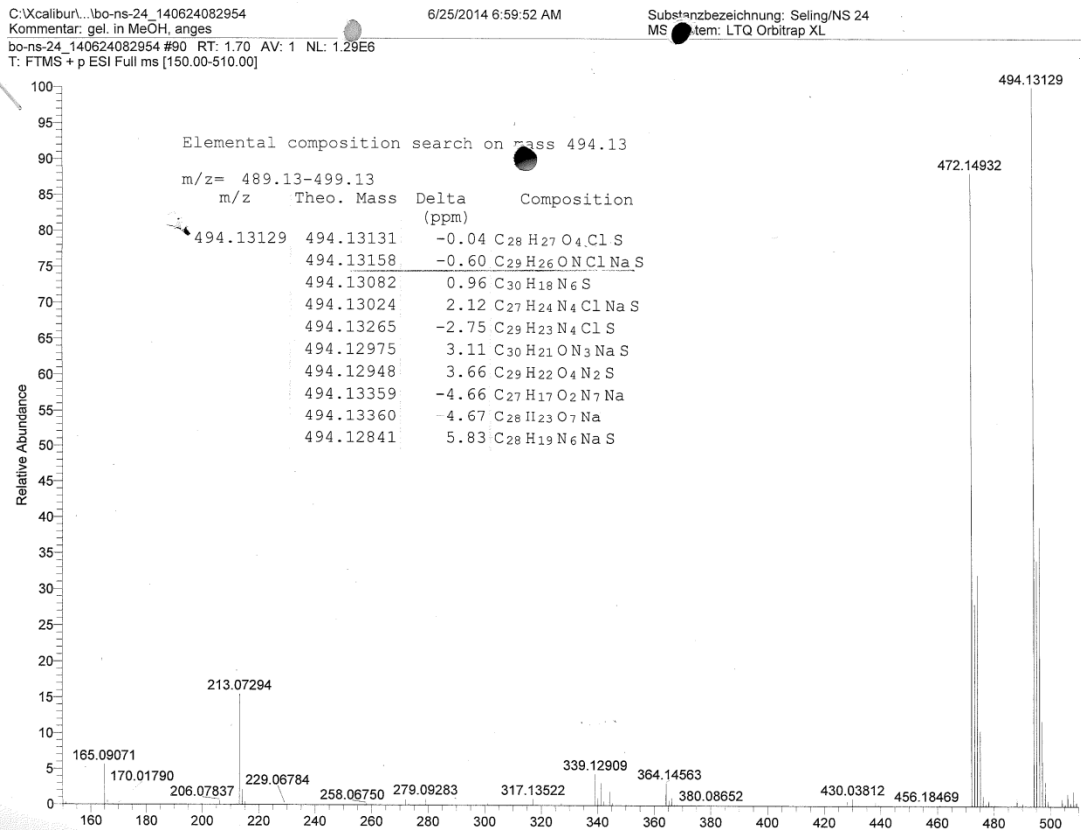

Supplement: c5md00367a1.pdf [file c5md00367a1.pdf]
